# Supplementary material for: Quality of Life before and after Sleeve Gastrectomy in Lebanese Population
Source: J Obes. 2019 Aug 6;2019:1952538. doi: 10.1155/2019/1952538 (PMC6701272; doi:10.1155/2019/1952538)
Supplement: Supplementary Materials — The tables representing the data used to support the findings of this study are included within the supplementary information file. [file 1952538.f1.xlsx]

## Sheet: Fady
											Before Surgery													After Surgery														Before Surgery					After Surgery						Before Surgery
Number		Male	Female		BMI before surgery	BMI after surgery	Percentage of BMI loss		Age		Self esteem	Physical activity	Social	Work	Sexual	Food approach	Score	Very Poor	Poor	Fair	Good	Very Good		Self esteem	Physical activity	Social	Work	Sexual	Food approach	Score	Very Poor	Poor	Fair	Good	Very Good			HTN	Diabetes	DSL	Smoking		HTA	Diabetes	DSL	Smoking			Sleep Apnea
1		0	1		41.7	28	32.8537		36		-0.2	-0.5	-0.1	-0.1	-0.2	-0.4	-1.5	0	1	0	0	0		0.5	0.3	0.4	0.5	0.5	0.1	2.3	0	0	0	0	1			1	1	1	0		0	0	0	0			0
2		0	1		51.49	36.4	29.3067		53		0.3	-0.5	0.1	0.3	-0.4	-0.5	-0.7	0	0	1	0	0		0.5	0.3	0.5	0.4	0	0.3	2	0	0	0	1	0			0	0	0	0		0	0	0	0			1
3		0	1		43	28.9	32.7907		53		-0.5	-0.5	0.3	-0.2	-0.4	0.2	-1.1	0	1	0	0	0		0.3	0.3	0.5	0.3	0	0.5	1.9	0	0	0	1	0			0	0	0	1		0	0	0	1			1
4		0	1		42.34	28	33.8687		39		-0.3	-0.5	0.5	0.5	0.1	-0.1	0.2	0	0	1	0	0		0.2	0.3	0.5	0.5	0.3	0.1	1.9	0	0	0	1	0			1	0	0	0		1	0	0	0			0
5		0	1		41.1	25	39.1727		34		-0.5	-0.3	0.1	0.2	0.2	-0.3	-0.6	0	0	1	0	0		0.5	0.3	0.3	0.3	0.3	0.3	2	0	0	0	1	0			0	0	0	0		0	0	0	0			0
6		1	0		38.5	24.2	37.1429		20		-0.2	-0.3	0.2	0.1	0	-0.3	-0.5	0	0	1	0	0		0.1	0.1	0.2	0.1	0	-0.1	0.4	0	0	1	0	0			0	0	0	1		0	0	0	1			0
7		1	0		44	32.2	26.8182		39		-0.1	-0.5	0.3	0.1	-0.2	-0.1	-0.5	0	0	1	0	0		0.3	0.2	0.3	0.2	0.4	0.3	1.7	0	0	0	1	0			1	1	1	0		0	0	1	0			1
8		0	1		41	25.47	37.878		23		-0.2	0.1	0.2	0.2	0	0.3	0.6	0	0	1	0	0		0.3	0.3	0.4	0.2	0	0.1	1.3	0	0	0	1	0			0	0	1	0		0	0	1	0			1
9		0	1		40.4	25.2	37.6238		28		-0.5	-0.5	0.4	0.4	0.4	-0.1	0.1	0	0	1	0	0		0.4	0.3	0.4	0.4	0.4	0.3	2.2	0	0	0	0	1			0	0	1	1		0	0	0	1			1
10		0	1		35.2	21.6	38.6364		30		0.2	-0.4	0.3	0.1	-0.3	0.5	0.4	0	0	1	0	0		0.5	0.3	0.3	0.3	0.1	0.5	2	0	0	0	1	0			0	1	0	0		0	0	0	0			0
11		0	1		45.4	24.6	45.815		25		-0.5	-0.5	-0.3	0.4	-0.1	-0.5	-1.5	0	1	0	0	0		0.5	0.4	0.5	0.4	0.5	-0.1	2.2	0	0	0	0	1			0	0	0	0		0	0	0	0			0
12		0	1		39.06	23.4	40.0922		22		-0.1	-0.3	0.5	0.5	0	0.1	0.7	0	0	1	0	0		0.3	0.5	0.5	0.5	0	-0.1	1.7	0	0	0	1	0			0	0	0	0		0	0	0	0			0
13		1	0		46.24	31.3	32.3097		39		0.2	-0.2	0.5	0.5	0	-0.2	0.8	0	0	1	0	0		0.5	0.3	0.5	0.3	0	0.2	1.8	0	0	0	1	0			0	0	0	0		0	0	0	0			0
14		0	1		38.5	33.05	14.1558		34		-0.1	0.2	-0.2	0.4	0.4	-0.3	0.4	0	0	1	0	0		0.3	0.2	-0.1	0.2	0.2	-0.1	0.7	0	0	1	0	0			1	1	0	0		0	0	0	0			0
15		0	1		52.63	40.7	22.6677		39		-0.4	-0.3	0.2	0.3	-0.1	-0.2	-0.5	0	0	1	0	0		0.2	0.2	0.3	0.3	0.3	0.2	1.5	0	0	0	1	0			1	0	0	0		1	0	0	0			0
16		1	0		43.8	29.26	33.1963		21		-0.1	0.1	0.3	0.2	0.1	-0.1	0.5	0	0	1	0	0		0.3	0.4	0.5	0.3	0.4	-0.2	1.7	0	0	0	1	0			0	0	0	0		0	0	0	0			0
17		0	1		43	29.7	30.9302		37		-0.1	-0.2	0.4	0.5	0.1	0.1	0.8	0	0	1	0	0		0.4	0.3	0.4	0.5	0.2	0.1	1.9	0	0	0	1	0			0	0	0	0		0	0	0	0			0
18		0	1		47.92	31.6	34.0568		36		-0.1	-0.4	0.5	0.2	0.1	0.3	0.6	0	0	1	0	0		0.3	0.3	0.5	-0.1	0.3	0.2	1.5	0	0	0	1	0			0	0	0	0		0	0	0	0			0
19		0	1		40	33.6	16		49		-0.5	-0.3	0.4	-0.2	0.5	-0.3	-0.4	0	0	1	0	0		0.2	-0.3	0.5	0.2	0.5	0.3	1.4	0	0	0	1	0			1	1	1	1		0	0	0	0			0
20		0	1		40	25	37.5		18		0.3	-0.3	-0.1	0.3	0	0.1	0.3	0	0	1	0	0		0.5	-0.1	0.5	0.3	0	-0.5	0.7	0	0	1	0	0			0	0	0	0		0	0	0	0			0
21		0	1		44.68	29.4	34.1987		33		-0.4	-0.3	0.5	0.5	0	0.4	0.7	0	0	1	0	0		0.5	0.4	0.5	0.5	0	0.5	2.4	0	0	0	0	1			0	0	0	0		0	0	0	0			0
22		1	0		42	29.93	28.7381		56		-0.1	-0.5	0.5	0.3	0.1	-0.5	-0.2	0	0	1	0	0		0.5	0.2	0.5	0.3	-0.2	-0.3	1	0	0	1	0	0			1	0	0	1		1	0	0	1			1
23		0	1		36.33	23.18	36.196		33		-0.4	-0.1	0.2	0.2	0	-0.4	-0.5	0	0	1	0	0		0.5	0.5	0.5	0.5	0.3	0.3	2.6	0	0	0	0	1			0	0	0	0		0	0	0	0			0
24		1	0		41	26.29	35.878		28		-0.3	-0.3	0.2	-0.1	-0.3	-0.3	-1.1	0	1	0	0	0		0.5	0.4	0.2	0.3	0.3	0.1	1.8	0	0	0	1	0			0	0	1	0		0	0	0	0			0
25		0	1		40.16	32	20.3187		46		0.4	-0.5	0.4	0.3	0.3	-0.2	0.7	0	0	1	0	0		0.3	0.2	0.4	0.2	0.3	-0.1	1.3	0	0	0	1	0			0	0	1	0		0	0	1	0			0
26		0	1		40	26.77	33.075		45		0.5	0.2	0.5	0.5	-0.1	-0.3	1.3	0	0	0	1	0		0.5	0.3	0.5	0.5	0.2	-0.1	1.9	0	0	0	1	0			1	0	0	0		0	0	0	0			0
27		0	1		40	25.25	36.875		22		-0.3	0.4	-0.3	-0.1	0	-0.4	-0.7	0	0	1	0	0		0.2	0.4	0.2	0.3	0	0.1	1.2	0	0	0	1	0			0	0	0	0		0	0	0	0			0
28		0	1		35	24.2	30.8571		27		0.3	0.1	0.2	0.3	0	-0.3	0.6	0	0	1	0	0		0.5	0.4	0.3	0.4	0	0.2	1.8	0	0	0	1	0			0	0	0	0		0	0	0	0			0
29		0	1		41	25.14	38.6829		40		-0.5	-0.5	0.5	-0.2	-0.1	-0.5	-1.3	0	1	0	0	0		0.5	0.5	0.5	0.3	0.4	0.1	2.3	0	0	0	0	1			0	0	0	1		0	0	0	1			1
30		0	1		34	24.97	26.5588		34		-0.4	-0.4	-0.2	0.5	-0.2	-0.4	-1.1	0	1	0	0	0		0.3	-0.1	0.4	0.2	-0.2	-0.3	0.3	0	0	1	0	0			0	0	0	0		0	0	0	0			0
31		1	0		39.52	18.81	52.4038		22		-0.3	-0.4	-0.2	-0.3	-0.3	-0.2	-1.7	0	1	0	0	0		0.3	0.2	0.5	0.4	0.1	0.2	1.7	0	0	0	1	0			0	0	1	1		0	0	0	1			0
32		0	1		40.6	30.46	24.9754		55		-0.2	-0.3	0.3	-0.1	-0.2	0.1	-0.4	0	0	1	0	0		0.2	0.3	0.3	0.1	0.2	0.1	1.2	0	0	0	1	0			1	1	1	0		0	0	0	0			1
33		0	1		38	27.85	26.7105		58		-0.2	-0.2	-0.4	0.2	0	-0.4	-1	0	0	1	0	0		0.4	0.1	0.4	0.4	0	0.1	1.4	0	0	0	1	0			1	0	0	0		1	0	0	0			0
34		1	0		45.85	23.12	49.5747		26		-0.3	-0.2	0.2	-0.1	-0.3	0.1	-0.6	0	0	1	0	0		0.2	0.4	0.4	0.4	0.5	0.1	2	0	0	0	1	0			0	0	0	1		0	0	0	1			0
35		0	1		39.7	24.77	37.6071		35		-0.1	-0.1	-0.4	-0.1	-0.4	0.2	-0.9	0	0	1	0	0		0.4	0.5	0.3	0.5	0.5	0.3	2.5	0	0	0	0	1			0	0	0	0		0	0	0	0			1
36		0	1		42	25.78	38.619		34		0.1	-0.1	0.5	0.3	0.2	0.4	1.4	0	0	0	1	0		0.5	0.5	0.5	0.5	0.4	0.2	2.6	0	0	0	0	1			0	0	0	0		0	0	0	0			1
37		0	1		40.5	29.86	26.2716		37		-0.3	-0.3	-0.5	-0.2	-0.1	-0.2	-1.6	0	1	0	0	0		0.3	0.3	0.4	0.4	0.2	-0.1	1.5	0	0	0	1	0			0	0	0	1		0	0	0	1			1
38		0	1		37.37	30.45	18.5175		40		-0.1	0.1	0.2	0.3	0	-0.1	0.4	0	0	1	0	0		-0.1	0.1	0.2	0.4	0	-0.3	0.3	0	0	1	0	0			0	0	0	0		0	0	0	0			0
39		0	1		40	26.33	34.175		30		-0.5	-0.5	-0.1	-0.3	0.1	-0.2	-1.5	0	1	0	0	0		0.5	0.3	0.5	0.1	0.5	0.2	2.1	0	0	0	0	1			0	0	0	0		0	0	0	0			1
40		1	0		41.5	27.45	33.8554		48		-0.1	-0.2	0.1	0.2	-0.1	0.2	0.1	0	0	1	0	0		0.3	0.3	0.2	0.2	0.1	0.1	1.2	0	0	0	1	0			1	1	1	0		1	0	1	0			1
41		1	0		39.79	29.4	26.1121		54		-0.3	-0.1	0.2	0.4	0.2	0.3	0.7	0	0	1	0	0		0.4	0.5	0.5	0.2	0.3	-0.2	1.7	0	0	0	1	0			1	1	1	0		1	1	0	0			0
42		1	0		39.86	24.69	38.0582		37		0.3	0.2	-0.4	0.1	0.4	0.2	0.8	0	0	1	0	0		0.5	0.5	0.4	0.4	0.5	-0.2	2.1	0	0	0	0	1			0	0	0	0		0	0	0	0			1
43		0	1		34.04	21.25	37.5734		27		-0.5	-0.5	0.4	-0.5	-0.1	-0.5	-1.7	0	1	0	0	0		0.5	0.5	0.4	0.5	0.5	0.1	2.5	0	0	0	0	1			0	1	1	0		0	1	1	0			0
44		0	1		34	26.64	21.6471		19		-0.1	-0.2	0.1	0.5	0	-0.4	-0.1	0	0	1	0	0		0.3	0.3	0.3	0.3	0	-0.4	0.8	0	0	1	0	0			0	0	0	0		0	0	0	0			0
45		0	1		39.84	25	37.249		43		0.1	-0.5	0.1	0.1	0.2	-0.5	-0.5	0	0	1	0	0		0.3	0.2	0.4	0.4	0.3	0.1	1.7	0	0	0	1	0			0	0	0	0		0	0	0	0			1
46		1	0		39.27	29.04	26.0504		47		-0.2	-0.2	0.2	0.3	0.2	-0.1	0.2	0	0	1	0	0		0.3	0.3	0.3	0.4	0.3	0.4	2	0	0	0	1	0			1	1	1	0		0	0	1	0			1
47		0	1		36.58	25.32	30.7818		38		-0.4	-0.5	-0.4	0.2	0.2	-0.1	-1	0	0	1	0	0		0.4	0.3	0.4	0.3	0.3	0.1	1.8	0	0	0	1	0			1	0	1	0		0	0	1	0			1
48		0	1		38.47	24.39	36.5999		31		-0.1	-0.2	-0.4	-0.1	-0.2	0.5	-0.5	0	0	1	0	0		0.5	0.4	0.5	0.4	0.5	0.4	2.7	0	0	0	0	1			0	0	0	0		0	0	0	0			0
49		1	0		46.92	29.39	37.3615		48		-0.4	-0.3	-0.3	-0.1	-0.2	-0.1	-1.4	0	1	0	0	0		0.4	0.5	0.5	0.3	0.4	-0.1	2	0	0	0	1	0			1	0	1	0		1	0	0	0			1
50		0	1		40	24.89	37.775		46		-0.3	-0.3	-0.2	-0.2	0.1	0.3	-0.6	0	0	1	0	0		0.5	0.4	0.5	0.3	0.4	0.4	2.5	0	0	0	0	1			1	0	0	0		1	0	0	0			0
51		0	1		45.45	30.48	32.9373		37		-0.5	-0.2	-0.3	-0.3	-0.2	-0.5	-2	0	1	0	0	0		0.3	0.2	0.3	0.3	0.1	0.1	1.3	0	0	0	1	0			1	0	0	0		0	0	0	0			0
52		0	1		40	26.17	34.575		51		-0.5	-0.4	-0.1	-0.1	-0.3	-0.2	-1.6	0	1	0	0	0		0.4	0.4	0.3	0.4	0.4	0.3	2.2	0	0	0	0	1			0	0	0	0		0	0	0	0			0
53		0	1		31.67	23.71	25.1342		32		-0.2	-0.3	-0.1	-0.1	-0.1	-0.1	-0.9	0	0	1	0	0		0.4	0.3	0.5	0.4	0.5	0.1	2.2	0	0	0	0	1			0	1	0	0		0	0	0	0			0
54		0	0		43.39	29.37	32.3116		31		-0.5	-0.5	-0.1	0.1	0	-0.5	-1.5	0	1	0	0	0		0.5	0.4	0.4	0.4	0	-0.2	1.5	0	0	0	1	0			1	0	0	0		0	0	0	0			1
55		0	1		34.37	21.99	36.0198		44		0.1	0.1	0.5	0.3	0.1	-0.1	1	0	0	1	0	0		0.5	0.3	0.5	0.1	0.3	0.3	2	0	0	0	1	0			0	0	0	0		0	0	0	0			1
56		1	0		44	31.1	29.3182		45		-0.1	-0.5	0.2	0.3	0.3	0.4	0.6	0	0	1	0	0		0.1	-0.1	0.3	0.2	0.3	0.1	0.9	0	0	1	0	0			1	0	0	0		0	0	0	0			1
57		0	1		42	25.1	40.2381		52		-0.3	-0.4	-0.3	-0.4	-0.5	-0.5	-2.4	1	0	0	0	0		0.5	0.5	0.5	0.4	0.4	0.4	2.7	0	0	0	0	1			0	0	0	0		0	0	0	0			0
58		0	1		35.09	21.77	37.9595		35		-0.5	-0.3	0.5	0.2	0.3	0.3	0.5	0	0	1	0	0		0.5	0.5	0.5	0.1	0.4	0.1	2.1	0	0	0	0	1			0	1	1	0		0	0	0	0			1
59		0	1		34.13	26.83	21.3888		62		-0.5	-0.5	-0.3	-0.5	0	0.1	-1.7	0	1	0	0	0		0.5	0.2	0.1	0.5	0	0.4	1.7	0	0	0	1	0			0	0	1	0		0	0	0	0			1
60		0	1		40	25.34	36.65		38		-0.3	-0.5	-0.1	-0.3	-0.2	-0.1	-1.5	0	1	0	0	0		0.5	0.5	0.5	0.5	0	0.3	2.3	0	0	0	0	1			0	1	0	0		0	0	0	0			0
61		1	0		39.54	25.53	35.4325		37		-0.2	-0.3	0.2	0.2	0.1	0.1	0.1	0	0	1	0	0		0.3	0.3	0.3	0.3	0.2	0.2	1.6	0	0	0	1	0			0	0	1	0		0	0	0	0			0
62		0	1		39.31	25.5	35.131		38		-0.3	-0.3	-0.2	-0.3	-0.2	-0.2	-1.5	0	1	0	0	0		0.5	0.3	0.5	0.5	0.4	0.2	2.4	0	0	0	0	1			0	0	0	1		0	0	0	1			0
63		0	1		35	25.04	28.4571		22		0.2	-0.5	0.3	0.3	0	-0.2	0.1	0	0	1	0	0		0.4	0.3	0.4	0.3	0	0.5	1.9	0	0	0	1	0			0	0	0	0		0	0	0	0			0
64		1	0		41.04	25.16	38.694		27		-0.3	-0.1	-0.5	-0.4	0	-0.1	-1.4	0	1	0	0	0		0.5	0.5	0.5	0.3	0	0.1	1.9	0	0	0	1	0			0	0	1	0		0	0	0	0			1
65		0	1		40	30.48	23.8		24		0.1	-0.1	0.3	0.3	0	-0.2	0.4	0	0	1	0	0		0.3	0.2	0.4	0.5	0	0.1	1.5	0	0	0	1	0			0	0	0	0		0	0	0	0			0
66		0	1		33	23.53	28.697		30		-0.2	-0.3	0.5	0.4	-0.1	0.1	0.4	0	0	1	0	0		0.4	0.3	0.5	0.1	0.3	-0.3	1.3	0	0	0	1	0			0	0	0	0		0	0	0	0			1
67		0	1		40.07	26.77	33.1919		38		0.1	-0.5	0.2	0.1	0.1	0.1	0.1	0	0	1	0	0		0.1	0.3	0.3	0.5	0.3	-0.2	1.3	0	0	0	1	0			0	0	0	0		0	0	0	0			0
68		0	1		44.17	31	29.8166		28		0.2	-0.2	0.3	0.4	0	-0.2	0.5	0	0	1	0	0		0.2	0.5	0.3	0.5	0	-0.1	1.4	0	0	0	1	0			0	0	0	0		0	0	0	0			0
69		0	1		31	22.65	26.9355		40		-0.5	-0.1	0.1	0.5	0	0.2	0.2	0	0	1	0	0		0.2	0.5	0.5	0.5	0.1	0.4	2.2	0	0	0	0	1			0	0	0	0		0	0	0	0			0
70		1	0		44.3	30.83	30.4063		35		-0.4	-0.4	-0.1	0.1	-0.4	-0.1	-1.3	0	1	0	0	0		0.2	0.2	0.1	0.2	0	-0.4	0.3	0	0	1	0	0			0	0	0	1		0	0	0	1			0
71		0	1		40.35	25.56	36.6543		36		0.1	0.3	0.5	0.5	0.5	0.1	2	0	0	0	1	0		0.5	0.3	0.5	0.2	0.3	0.1	1.9	0	0	0	1	0			0	0	0	0		0	0	0	0			0
72		0	1		36.32	24.25	33.2324		28		-0.1	-0.3	0.2	0.2	0.3	-0.4	-0.1	0	0	1	0	0		0.2	0.2	0.2	0.3	0.3	0.2	1.4	0	0	0	1	0			0	0	0	0		0	0	0	0			0
73		0	1		40.17	24.97	37.8392		27		0.2	-0.4	0.3	0.4	0	-0.2	0.3	0	0	1	0	0		0.5	-0.4	0.2	0.4	0	-0.3	0.4	0	0	1	0	0			0	0	0	1		0	0	0	1			0
74		0	1		43.88	34.06	22.3792		35		-0.3	-0.5	-0.3	0.3	0.4	-0.5	-0.9	0	0	1	0	0		-0.1	-0.5	0.2	-0.1	0.3	0.3	0.1	0	0	1	0	0			0	0	1	0		0	0	0	0			0
75		0	0		41.66	28.84	30.7729		34		-0.1	-0.1	0.1	0.1	0	-0.5	-0.5	0	0	1	0	0		0.5	0.5	0.4	0.5	0	0.1	2	0	0	0	1	0			0	0	0	0		0	0	0	0			0
[truncated: 13 more columns]
